# Supplementary material for: Integrated Analysis of Multiple Microarrays Based on Raw Data Identified Novel Gene Signatures in Recurrent Implantation Failure
Source: Front Endocrinol (Lausanne). 2022 Feb 7;13:785462. doi: 10.3389/fendo.2022.785462 (PMC8859149; doi:10.3389/fendo.2022.785462)
Supplement: Supplementary Table 5 — Results of the CytoHubba. [file Table_5.xlsx]

## Sheet: cytohubba
node_name	MCC	DMNC	MNC	Degree	EPC	BottleNeck	EcCentricity	Closeness	Radiality	Betweenness	Stress	ClusteringCoefficient
TPD52L1	1	0	1	1	2.658	1	0.05	14.2489	4.51379	0	0	0
ST6GALNAC1	1	0	1	1	7.787	1	0.05	19.4659	5.49368	0	0	0
SLC7A4	1	0	1	1	1.913	1	0.03929	11.1426	3.13563	0	0	0
VPS37B	1	0	1	1	1.422	1	0.0125	1	0.0375	0	0	0
SH3YL1	1	0	1	1	1.422	1	0.0125	1	0.0375	0	0	0
TSC22D3	1	0	1	1	1.45	1	0.0125	1	0.0375	0	0	0
SCNN1A	1	0	1	1	1.45	1	0.0125	1	0.0375	0	0	0
SMAD9	2	0.30779	2	2	2.382	1	0.01042	2.83333	0.10156	0	0	1
SMAD7	2	0.30779	2	2	2.416	1	0.01042	2.83333	0.10156	0	0	1
PTPN3	1	0	1	1	5.129	1	0.055	18.5139	5.36092	0	0	0
XDH	1	0	1	1	3.113	1	0.04231	14.3639	4.38103	0	0	0
TYMP	1	0	1	1	2.765	1	0.04231	14.3639	4.38103	0	0	0
PIWIL2	1	0	1	1	1.407	1	0.0125	1	0.0375	0	0	0
PIR	1	0	1	1	1.407	1	0.0125	1	0.0375	0	0	0
PLCH1	1	0	1	1	1.982	1	0.01042	2.33333	0.09375	0	0	0
PLCD3	2	0.30779	2	2	2.512	1	0.01563	3	0.10938	0	0	1
PIP5K1B	3	0.30779	2	3	2.726	2	0.01563	3.5	0.11719	6	6	0.33333
NR4A2	1	0	1	1	10.122	1	0.06111	22.9444	5.91724	0	0	0
NNMT	1	0	1	1	2.905	1	0.04231	14.3639	4.38103	0	0	0
MUC16	1	0	1	1	8.387	1	0.055	21.4032	5.72126	0	0	0
TPD52	2	0	1	2	4.512	2	0.055	17.2889	5.05747	172	244	0
MPHOSPH10	1	0	1	1	4.944	1	0.055	18.2639	5.34828	0	0	0
MAGEA1	1	0	1	1	6.157	1	0.05	19.2492	5.39885	0	0	0
ZP2	1	0	1	1	1.415	1	0.0125	1	0.0375	0	0	0
LMBR1	1	0	1	1	1.415	1	0.0125	1	0.0375	0	0	0
XPR1	1	0	1	1	2.279	1	0.01563	2.5	0.0625	0	0	0
LAMB3	6	0.46346	3	3	3.256	1	0.01563	3.5	0.07813	0	0	1
LAMC1	7	0.46346	3	4	3.408	2	0.03125	4	0.08594	6	6	0.5
LAMC2	6	0.46346	3	3	3.292	1	0.01563	3.5	0.07813	0	0	1
LAMA4	6	0.46346	3	3	3.237	1	0.01563	3.5	0.07813	0	0	1
PICK1	1	0	1	1	1.451	1	0.0125	1	0.0375	0	0	0
ICA1	1	0	1	1	1.451	1	0.0125	1	0.0375	0	0	0
HS6ST1	1	0	1	1	1.713	1	0.00781	2.08333	0.11719	0	0	0
HOXB6	2	0.30779	2	2	5.599	1	0.05	16.3675	4.8931	0	0	1
MEIS1	3	0.30779	2	3	10.355	4	0.06111	24.5278	5.95517	504	856	0.33333
HOXB7	4	0.30898	3	3	7.27	2	0.055	19.8996	5.43046	85	216	0.66667
HOXB4	4	0.30898	3	3	7.404	1	0.055	19.8996	5.43046	85	216	0.66667
TM7SF2	2	0.30779	2	2	9.643	1	0.055	19.5163	5.42414	0	0	1
HMGCS1	10	0.32413	5	5	14.456	4	0.06111	25.4444	5.96149	334	634	0.5
IDI1	6	0.46346	3	3	12.15	1	0.055	20.0163	5.43046	0	0	1
SQLE	8	0.37893	4	4	12.367	1	0.055	20.5163	5.43678	2	4	0.66667
HMGCR	8	0.37893	4	4	14.174	1	0.06111	24.9444	5.95517	166	420	0.66667
MRPS2	3	0.30779	2	3	7.811	3	0.06111	21.1155	5.58851	340	484	0.33333
NEBL	1	0	1	1	1.452	1	0.0125	1	0.0375	0	0	0
HAND2	1	0	1	1	1.452	1	0.0125	1	0.0375	0	0	0
SOD2	4	0.30779	2	4	11.049	14	0.06875	25.2559	6.04368	1924	2860	0.33333
GORASP1	1	0	1	1	5.291	1	0.055	18.5139	5.36092	0	0	0
LPAR1	2	0.30779	2	2	2.301	1	0.0125	2.5	0.06667	0	0	1
LPAR3	2	0.30779	2	2	2.254	1	0.0125	2.5	0.06667	0	0	1
RRAS	1	0	1	1	1.896	1	0.0125	2	0.05833	0	0	0
GNG11	3	0.30779	2	3	2.501	2	0.025	3	0.075	4	4	0.33333
SLC15A4	2	0	1	2	2.541	2	0.04231	13.1727	3.67931	172	244	0
GPX3	3	0.30779	2	3	10.829	3	0.06875	24.0988	5.97414	340	484	0.33333
NME4	1	0	1	1	8.683	1	0.04583	18.1104	5.20287	0	0	0
GAST	1	0	1	1	5.689	1	0.05	18.7492	5.37356	0	0	0
RGMB	3	0.30779	2	3	2.66	5	0.01563	3.5	0.11719	8	8	0.33333
PPP2R5A	1	0	1	1	1.422	1	0.0125	1	0.0375	0	0	0
FRAT2	1	0	1	1	1.422	1	0.0125	1	0.0375	0	0	0
PLAUR	1	0	1	1	10.709	1	0.05	22.0064	5.71494	0	0	0
GC	5	0.30898	3	4	17.486	2	0.05	23.8397	5.74655	173.5	580	0.33333
HABP2	2	0.30779	2	2	14.368	1	0.05	22.673	5.72759	0	0	1
NELL2	1	0	1	1	1.437	1	0.0125	1	0.0375	0	0	0
FAM102A	1	0	1	1	1.437	1	0.0125	1	0.0375	0	0	0
SALL1	2	0.30779	2	2	6.607	1	0.055	19.0139	5.36724	0	0	1
EYA1	2	0.30779	2	2	6.465	1	0.055	19.0139	5.36724	0	0	1
TXNRD1	4	0.30779	2	4	16.096	43	0.07857	30.0381	6.40402	2736	4304	0.16667
PAX2	3	0.30779	2	3	10.708	3	0.06111	24.1694	5.9046	340	536	0.33333
PINX1	2	0	1	2	9.6	2	0.06111	23.5028	5.89195	172	270	0
TGFA	3	0	1	3	10.076	3	0.06111	24.1694	5.9046	342	538	0
HDAC7	1	0	1	1	9.492	1	0.06111	22.8361	5.87931	0	0	0
PROM1	1	0	1	1	7.093	1	0.05	19.4171	5.46207	0	0	0
SP8	1	0	1	1	1.424	1	0.0125	1	0.0375	0	0	0
EMX2	1	0	1	1	1.424	1	0.0125	1	0.0375	0	0	0
ELF3	1	0	1	1	9.28	1	0.06111	22.8361	5.87931	0	0	0
PLCB1	3	0.30779	2	3	2.729	2	0.01563	3.5	0.11719	6	6	0.33333
EDNRA	1	0	1	1	1.965	1	0.01042	2.33333	0.09375	0	0	0
ELP3	1	0	1	1	1.427	1	0.0125	1	0.0375	0	0	0
DPH3	1	0	1	1	1.427	1	0.0125	1	0.0375	0	0	0
HERPUD1	1	0	1	1	1.426	1	0.0125	1	0.0375	0	0	0
DNAJB9	1	0	1	1	1.426	1	0.0125	1	0.0375	0	0	0
MLANA	2	0.30779	2	2	6.766	1	0.05	19.7492	5.40517	0	0	1
DCT	2	0.30779	2	2	7.092	1	0.05	19.7492	5.40517	0	0	1
MAP2K6	2	0	1	2	6.308	2	0.05	19.585	5.40517	172	254	0
CTNNA2	1	0	1	1	3.534	1	0.04583	15.806	4.86149	0	0	0
TGFB1I1	1	0	1	1	1.436	1	0.0125	1	0.0375	0	0	0
CSRP2	1	0	1	1	1.436	1	0.0125	1	0.0375	0	0	0
CRTC2	1	0	1	1	1.431	1	0.0125	1	0.0375	0	0	0
CREB3L1	1	0	1	1	1.431	1	0.0125	1	0.0375	0	0	0
SULF1	2	0	1	2	2.151	2	0.01042	2.83333	0.14063	6	6	0
COL3A1	2	0	1	2	2.254	5	0.01563	3	0.14844	8	8	0
PTPRG	1	0	1	1	1.444	1	0.0125	1	0.0375	0	0	0
CNTN3	1	0	1	1	1.444	1	0.0125	1	0.0375	0	0	0
GGT5	2	0	1	2	5.582	2	0.06111	19.2262	5.4431	172	244	0
CNDP2	1	0	1	1	3.431	1	0.055	15.619	4.89943	0	0	0
CD69	2	0	1	2	7.011	5	0.04583	20.3901	5.38621	664	968	0
TNFRSF1A	3	0	1	3	11.766	3	0.055	24.8972	5.93621	855	1264	0
CD36	1	0	1	1	9.166	1	0.06111	22.9444	5.91724	0	0	0
CDKN2B	1	0	1	1	1.415	1	0.0125	1	0.0375	0	0	0
CCND3	1	0	1	1	1.415	1	0.0125	1	0.0375	0	0	0
PNRC1	1	0	1	1	3.801	1	0.04231	15.7794	4.8046	0	0	0
C4BPA	2	0	1	2	6.737	2	0.04583	19.6401	5.34828	172	248	0
COLEC11	1	0	1	1	1.597	1	0.00938	1.5	0.05625	0	0	0
CD55	1	0	1	1	1.628	1	0.00938	1.5	0.05625	0	0	0
C2	2	0	1	2	1.853	3	0.01875	2	0.06562	2	2	0
CD40	5	0	1	5	12.226	12	0.05	25.4445	5.87931	1400.5	2090	0
BTK	1	0	1	1	6.28	1	0.04583	18.9735	5.33563	0	0	0
ATP6V1G1	2	0.30779	2	2	2.602	1	0.0125	3.33333	0.1125	0	0	1
ATP6V0E2	2	0.30779	2	2	2.646	1	0.0125	3.33333	0.1125	0	0	1
HSD11B2	1	0	1	1	2.17	1	0.0125	2.83333	0.105	0	0	0
MAP1LC3C	1	0	1	1	1.853	1	0.0125	2.5	0.09	0	0	0
ATP6V0D1	4	0.30779	2	4	3.11	6	0.01875	4.5	0.135	16	16	0.16667
ATG7	2	0	1	2	2.443	2	0.01875	3.5	0.12	8	8	0
CPS1	1	0	1	1	1.63	1	0.00938	1.5	0.05625	0	0	0
ASS1	2	0	1	2	1.883	3	0.01875	2	0.06562	2	2	0
ASRGL1	1	0	1	1	1.643	1	0.00938	1.5	0.05625	0	0	0
CLU	4	0.30898	3	3	18.644	1	0.055	24.9758	5.98678	0.4	2	0.66667
PKP2	1	0	1	1	1.427	1	0.0125	1	0.0375	0	0	0
ANK3	1	0	1	1	1.427	1	0.0125	1	0.0375	0	0	0
FST	2	0	1	2	2.294	2	0.01563	3	0.10938	6	6	0
ANG	1	0	1	1	1.74	1	0.01042	2.16667	0.08594	0	0	0
COL1A1	2	0	1	2	2.156	2	0.01042	2.83333	0.14063	6	6	0
ALPL	1	0	1	1	1.74	1	0.00781	2.08333	0.11719	0	0	0
HIBCH	3	0.30779	2	3	8.256	10	0.06111	21.6655	5.63276	1404	2052	0.33333
TF	3	0.30779	2	3	16.328	2	0.055	25.7925	6.03736	172	272	0.33333
PAEP	1	0	1	1	10.423	1	0.055	22.9925	5.86034	0	0	0
RXRA	8	0.30779	2	8	20.745	61	0.06875	32.8774	6.46092	2664	4640	0.07143
PTGS2	1	0	1	1	10.66	1	0.055	22.9925	5.86034	0	0	0
TLR2	3	0.30779	2	3	16.598	13	0.055	27.5258	6.17644	931.5	1452	0.33333
ESR1	8	0.30779	2	8	19.387	45	0.06875	32.7393	6.42299	2486	4042	0.03571
MUC1	6	0.30898	3	5	17.588	7	0.06111	29.6182	6.26494	1050.5	1624	0.2
ZBTB20	1	0	1	1	11.131	1	0.055	23.7496	5.9046	0	0	0
APOA2	32	0.34989	8	8	23.575	32	0.06111	33.423	6.44195	855.4	1982	0.42857
FGG	29	0.36588	7	8	23.062	3	0.055	31.3758	6.25862	616.567	1680	0.35714
SOX17	1	0	1	1	10.275	1	0.055	23.7496	5.9046	0	0	0
EPCAM	3	0.30779	2	3	15.334	2	0.055	25.7544	6.00575	172	304	0.33333
TYR	4	0.30779	2	4	11.697	4	0.055	25.7496	5.94253	508	784	0.16667
NTS	2	0	1	2	11.06	2	0.055	24.4163	5.91724	172	264	0
TTR	16	0.33284	6	6	22.859	4	0.055	30.3758	6.24598	292.833	1110	0.46667
APOC3	16	0.33284	6	6	22.382	2	0.055	30.8258	6.29655	336.833	916	0.46667
AFP	20	0.47366	4	11	23.449	34	0.06111	35.1063	6.44828	2213.9	4464	0.12727
SPON1	1	0	1	1	1.422	1	0.0125	1	0.0375	0	0	0
ADAMTS8	1	0	1	1	1.422	1	0.0125	1	0.0375	0	0	0
PNP	4	0	1	4	4.792	4	0.04583	18.0699	4.92471	510	1050	0
DPP4	2	0	1	2	11.415	6	0.055	24.3091	5.92356	820	1720	0
ADA	2	0	1	2	6.713	5	0.05	20.0969	5.43046	664	1384	0
TAGLN	2	0.30779	2	2	3.378	1	0.03929	14.9091	4.3431	0	0	1
LMOD1	2	0.30779	2	2	3.584	1	0.03929	14.9091	4.3431	0	0	1
MYL9	5	0.30898	3	4	4.492	4	0.04231	18.1794	4.88046	505	734	0.33333
ACTG2	4	0.30898	3	3	3.864	1	0.03929	15.4091	4.34943	1	2	0.66667
ALDH6A1	3	0.30779	2	3	6.277	9	0.055	19.3794	5.19023	1264	1840	0.33333
ACSS3	2	0.30779	2	2	4.846	1	0.05	16.5549	4.6908	0	0	1
LONP2	2	0.30779	2	2	4.062	1	0.04583	14.9502	4.1977	0	0	1
GLT1D1	2	0	1	2	3.455	3	0.04583	15.2002	4.21034	340	484	0
ACOX3	5	0.30779	2	5	5.618	7	0.05	18.4715	4.72874	990	1422	0.2
SAT1	1	0	1	1	1.423	1	0.0125	1	0.0375	0	0	0
ACOT9	1	0	1	1	1.423	1	0.0125	1	0.0375	0	0	0
IDH1	3	0.30779	2	3	4.119	2	0.04583	15.4502	4.20402	172	244	0.33333
ACO1	1	0	1	1	2.729	1	0.04231	12.5393	3.66034	0	0	0
ALB	22	0.2927	7	11	23.096	23	0.06111	33.6063	6.40402	2283.07	4812	0.14545
ABCC3	1	0	1	1	10.184	1	0.055	22.9925	5.86034	0	0	0
